# Supplementary material
Source: Royal Society of Chemistry journal article supplement (doi:10.1039/d6su00099a)
Supplement: d6su00099a1.pdf [file d6su00099a1.pdf]

**ELECTRONIC SUPPORTING INFORMATION (ESI)**

**Sustainable valorization of real polyurethane mattress waste  
via a novel multistage thermochemical approach**

Mónica Calero, Adriana Parra-Marfil, Rafael R. Solís, Gabriel Blázquez, Mario J.

Muñoz-Batista\*

M.J.M-B. mariomunoz@ugr.es

Department of Chemical Engineering, University of Granada, 18074 Granada, Spain

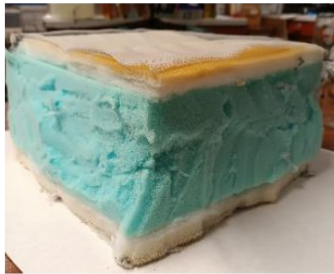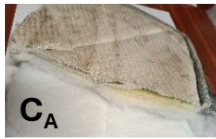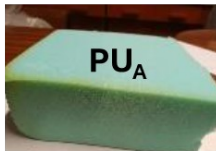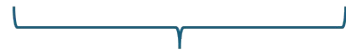

**Foam mattress based on polyurethane**

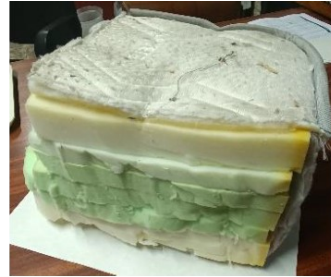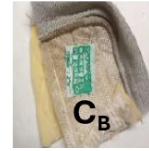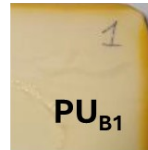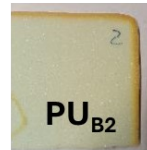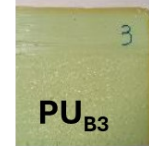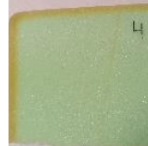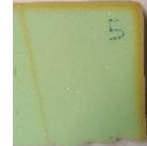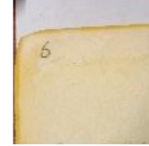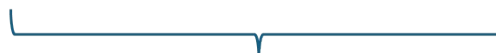

**Foam multilayer mattress based on polyurethane**

**Figure S1.** Representative images of the structure of samples from discarded mattresses.

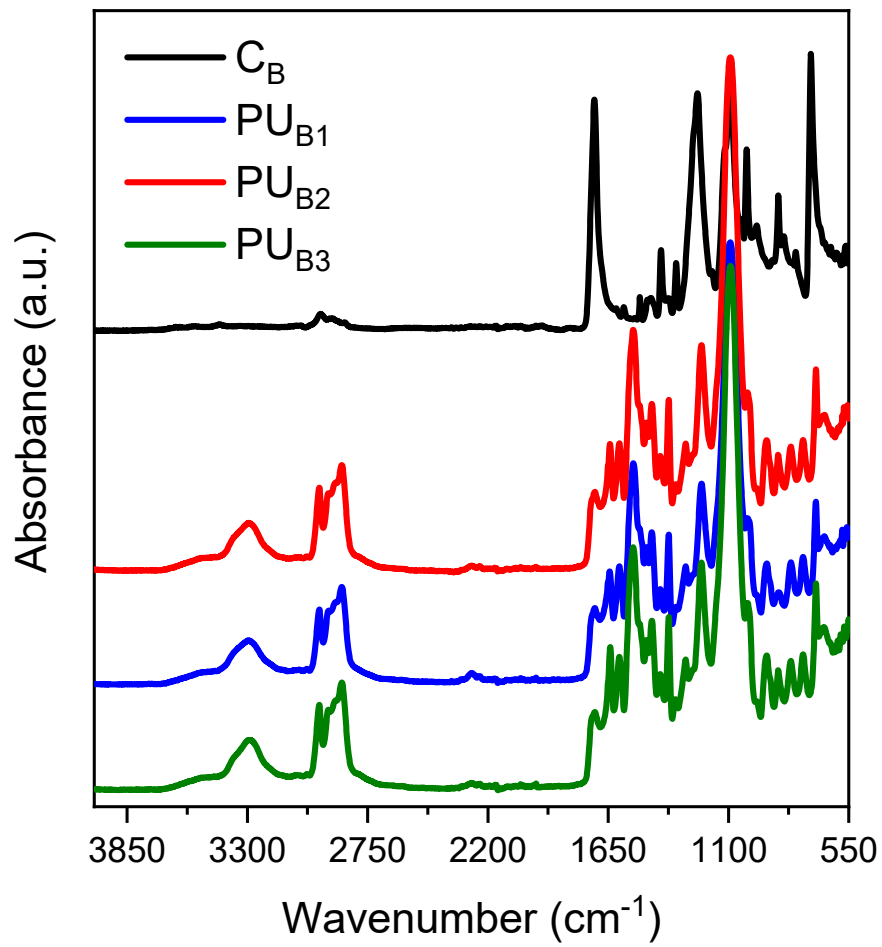

**Figure S2.** FTIR spectra employed for the identification of different parts of the multilayer polyurethane-based residual mattress samples.

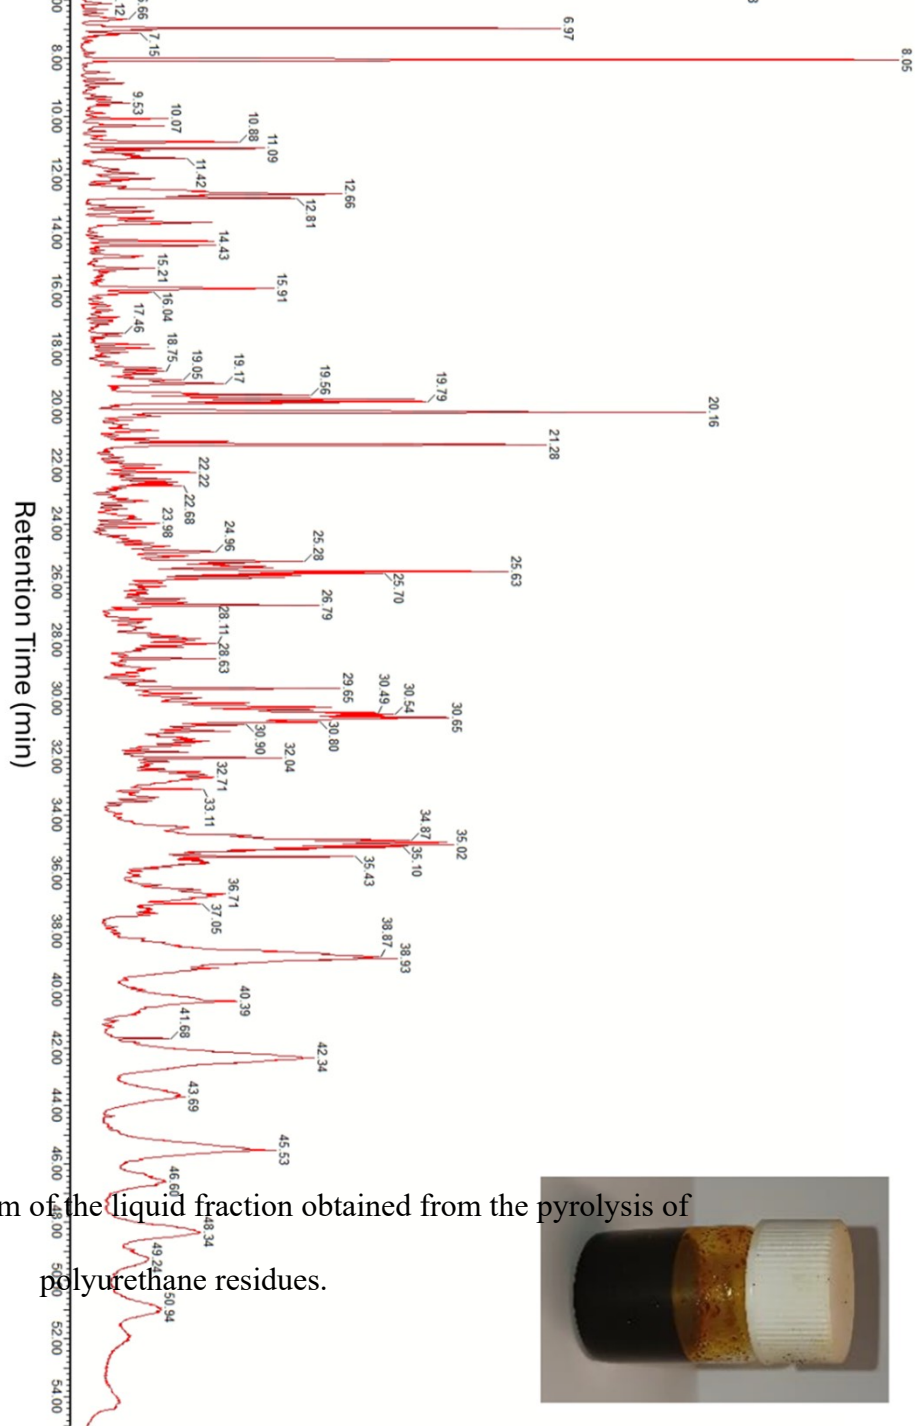

**Figure S3.** Chromatogram of the liquid fraction obtained from the pyrolysis of polyurethane residues.

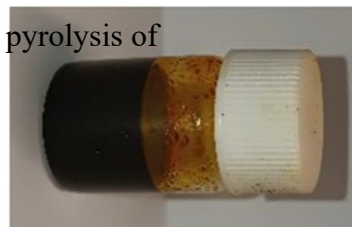

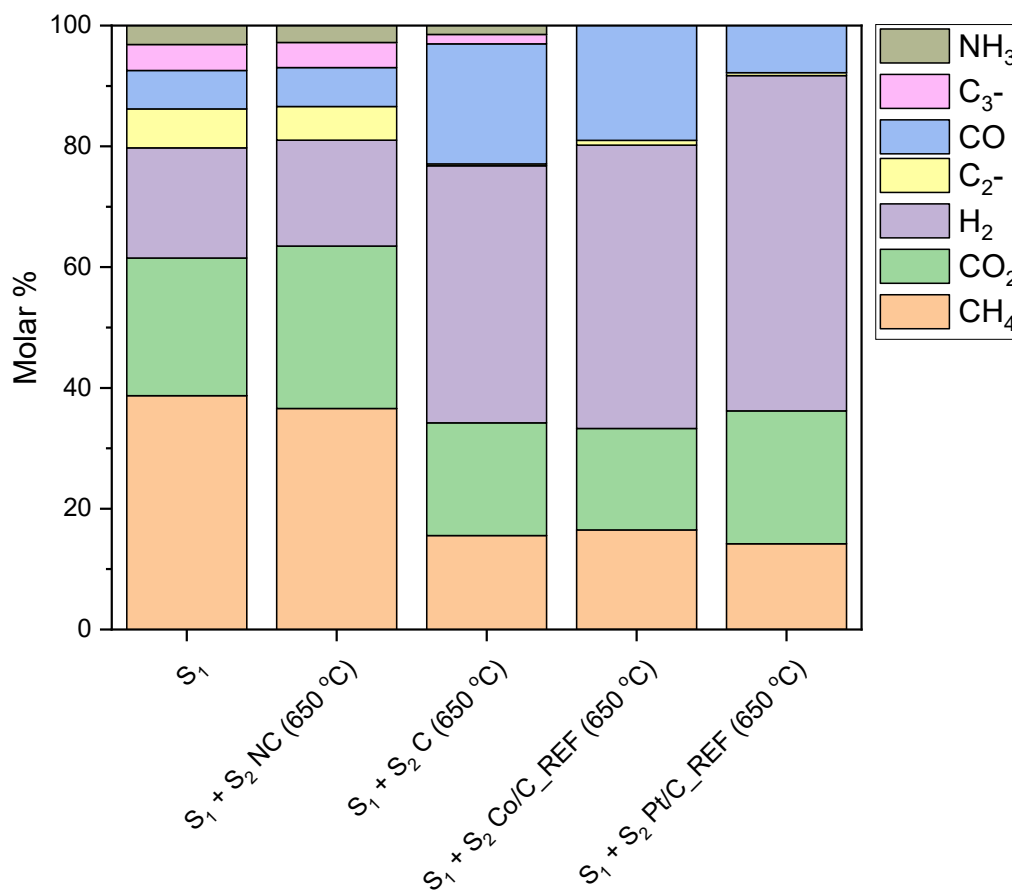

**Figure S4.** Catalytic performance results obtained in a two-step scheme (pyrolysis + catalytic transformation). S<sub>1</sub>: Step 1; S<sub>2</sub>: Step 2. NC refers to the reaction without catalyst (reference), whereas C corresponds to the reaction performed with the catalyst derived from residual fractions. Co/C corresponds to the data obtained using the reference catalyst with the same Co loading (0.5wt.%) supported on commercial carbon. Pt/C corresponds to the data obtained using the reference catalyst containing 0.5 wt.% Pt deposited on commercial carbon.

**Table S1.** Overview of literature on PU and waste mattress pyrolysis: conditions, products, and valorization pathways.

| Feedstock/main goal                                                                                                                     | Ref. | Pyrolysis Conditions                                                          | Gas (key information)                     | Proposal and demonstration of the applicability |                                   |                                |
|-----------------------------------------------------------------------------------------------------------------------------------------|------|-------------------------------------------------------------------------------|-------------------------------------------|-------------------------------------------------|-----------------------------------|--------------------------------|
|                                                                                                                                         |      |                                                                               |                                           | Gas                                             | Liquid                            | Solid                          |
| <b>Mattress</b>                                                                                                                         |      |                                                                               |                                           |                                                 |                                   |                                |
| Mattress/ Development of two models describing the pyrolysis and combustion degradation of PU wastes.                                   | 1    | TG-IR and TG-MS, up to 900 °C                                                 | decomposition steps, mechanistic analysis | Outside the scope of this work                  | Outside the scope of this work    | Outside the scope of this work |
| Waste mattress foam/Valorization of mattress foam waste via pyrolysis followed by thermal or catalytic cracking under inert atmosphere. | 2    | 550 °C pyrolysis + 300-800 °C catalytic cracking (Dolomite, Olivine, HiFUEL®) | CH <sub>4</sub> , H <sub>2</sub> , CO     | H <sub>2</sub> -rich gas                        | Chemical feedstock precursor      | Solid fuel                     |
| Whole mattress/                                                                                                                         | 3    | 400-500 °C, 4.2-16.8 bar                                                      | CO, CO <sub>2</sub> , CH <sub>4</sub>     | Energy generation                               | Aromatic-rich compounds. Chemical | Solid fuel                     |

|                                                                                                                                                  |   |                            |                                  |                                |                                 |                                |
|--------------------------------------------------------------------------------------------------------------------------------------------------|---|----------------------------|----------------------------------|--------------------------------|---------------------------------|--------------------------------|
| Pressurized pyrolysis of real mattress waste composed of PU foams, fabrics, and textiles with diverse chemical composition.                      |   |                            |                                  |                                | feedstock precursor             |                                |
| Polyurethane waste/Design and prepare low-cost, abundant catalysts and to investigate their effectiveness in the pyrolysis of polyurethane waste | 4 | 350-450 °C<br>(Kaolin/CuO) | Energy-rich gas mixture          | Fuel gas                       | Recovery of amines and monomers | Outside the scope of this work |
| <b>PU</b>                                                                                                                                        |   |                            |                                  |                                |                                 |                                |
| PU/Pyrolysis of various PUR investigated using TG-                                                                                               | 5 | TG-FTIR, up to 900 °C      | decomposition steps, mechanistic | Outside the scope of this work | Outside the scope of this work  | Outside the scope of this work |

|                                                                                                                                          |   |                                             |                                                                                                                        |                                   |                                                                                                                 |                                |
|------------------------------------------------------------------------------------------------------------------------------------------|---|---------------------------------------------|------------------------------------------------------------------------------------------------------------------------|-----------------------------------|-----------------------------------------------------------------------------------------------------------------|--------------------------------|
| FTIR                                                                                                                                     |   |                                             |                                                                                                                        |                                   |                                                                                                                 |                                |
| PU/ Pyrolysis behavior of seven PU with different hard/soft segment ratios studied under fast and slow pyrolysis conditions              | 6 | up to 900 °C °C (fast and slow pyrolysis)   | decomposition steps, mechanistic                                                                                       | Chemical feedstock recovery       | Precursor-rich fractions                                                                                        | Outside the scope of this work |
| PU/Thermal degradation of PU studied using Reactive Molecular Dynamics                                                                   | 7 | Reactive Molecular Dynamics, 300-3000 K     | CO, CO <sub>2</sub> , C <sub>2</sub> H <sub>4</sub> , H <sub>2</sub> O, HCN, NH <sub>3</sub> , CH <sub>2</sub> O       | Outside the scope of this work    | Outside the scope of this work                                                                                  | Outside the scope of this work |
| <b>This work:</b><br>Development of a two-stage process for valorizing all fractions generated from pyrolysis of real PU mattress waste. |   | Step 1: 525 °C<br>Step 2: Thermal catalysis | CH <sub>4</sub> , NH <sub>3</sub> , H <sub>2</sub> , CO <sub>2</sub> , and C <sub>2</sub> -C <sub>3</sub> hydrocarbons | H <sub>2</sub> -rich gas, ammonia | Valorization through its use in the production of a new catalytic material employed in a second catalytic stage |                                |

## References

- 1 M. A. Garrido and R. Font, *J. Anal. Appl. Pyrolysis*, 2015, 113, 202–215.
- 2 A. Veses, O. Sanahuja-Parejo, I. Martínez, M. S. Callén, J. M. López, T. García and R. Murillo, *Waste Management*, 2021, 120, 415–423.
- 3 D. Serrano, A. Horvat, R. M. Mata, P. Costa and F. Paraleda, *Waste Management*, 2024, 181, 11–19.
- 4 H. A. Sani, M. Muhammad, A. Muhammad and T. A. Saleh, *Next Sustainability*, 2024, 3, 100024.
- 5 M. Zeller, D. Merz, L. Weigel, S. Tavakkol and D. Stapf, *J. Anal. Appl. Pyrolysis*, 2025, 188, 107048.
- 6 Y. Nishiyama, S. Kumagai, S. Motokucho, T. Kameda, Y. Saito, A. Watanabe, H. Nakatani and T. Yoshioka, *J. Anal. Appl. Pyrolysis*, 2020, 145, 104754.
- 7 Q. Chen, T. B. Y. Chen, W. J. Yang, I. M. De Cachinho Cordeiro and R. K. K. Yuen, *Compos. Part A Appl. Sci. Manuf.*, 2026, 207, 109854.
